# Supplementary material for: Long-term reduction in CO 2 emissions from the Elbe River due to water quality improvement
Source: Copernicus journal article supplement (doi:10.5194/bg-2023-131), 2023-08-15
Supplement: Supplementary file 1 [file bg-2023-131-supplement.zip]

Archive with 2 entries (2 files):
- Supplementary Elbe.pdf
- Supplementary tables s1 and s2.xls
