# Supplementary material for: Long-term reduction in CO 2 emissions from the Elbe River due to water quality improvement
Source: Copernicus journal article supplement (doi:10.5194/bg-2023-131), 2023-08-15
Supplement: Supplementary file 1 [file bg-2023-131-supplement.zip › Supplementary Elbe.pdf]

# Supplementary

This file contains:

Supplemental methods

M1

M2

Supplementary figures S1 to S5

Supplementary table S1 reference to the csv file

## 1 CO<sub>2</sub> efflux calculation

### 1.1 pCO<sub>2</sub> calculation

The historical pCO<sub>2</sub> in the Elbe River has been calculated by the CO2SYS (Lewis and Wallace, 1998), due to the availability of major ions data. The reliability of CO2SYS was demonstrated in the research of Ran et al. (2021), by the comparison with in situ measurement pCO<sub>2</sub> data. Previous research in the Elbe estuary highlights differences between Phreeqc (Parkhurst and Appelo, 1999) and CO2SYS (Amann et al., 2014). Consequently, a comparative analysis of these two methods was conducted. The results show good agreement, while the CO2SYS could slight overestimate compare to those derived from Phreeqc.

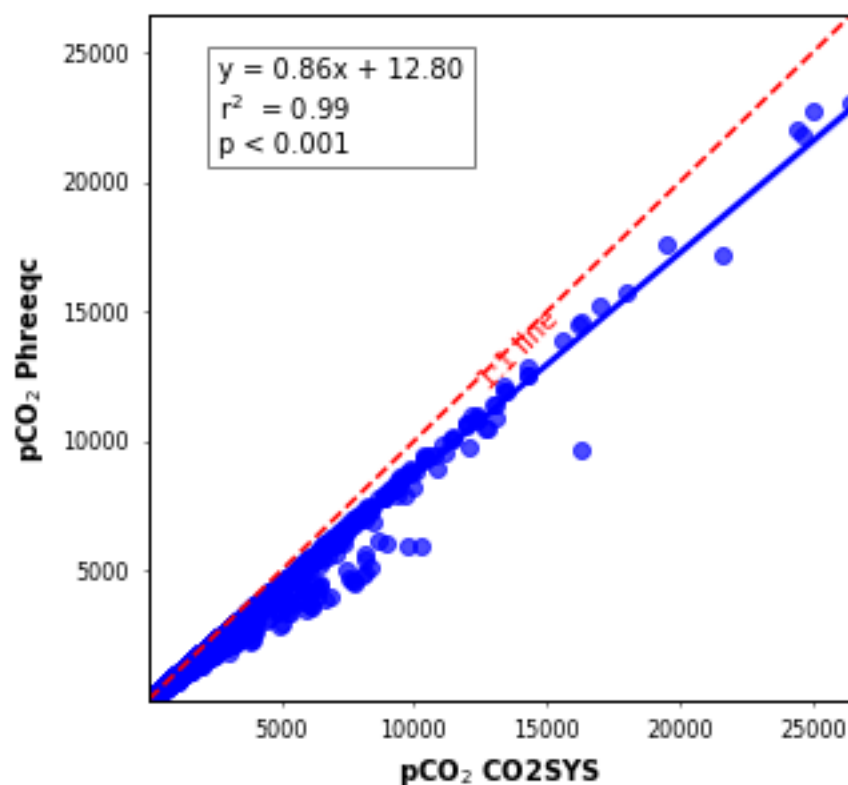

Figure S4, Comparison of calculated pCO<sub>2</sub> by CO2SYS and Phreeqc. The red dashed line is 1:1 line

and the blue line is the regression including 95% confidence interval (95%CI)

## 1.2 Data quality of MERIT-HYDRO

For the quality of flow discharge data from MERIT-Hydro (Lin et al., 2019; Yamazaki et al., 2019), we compare it with the daily observation from 10 hydrological stations in the Elbe River. The results show an overestimation of around 27.5 % between the GRADES and observation flow discharge especially in monthly and annual scales ( $r^2 = 0.80$ ,  $p < 0.001$ ).

Our method for scale gas transfer velocity was from Raymond et al. (2013). The slope for modeling each equation of this research were from NHDplus dataset developed by USGS. Liu et al. (2022) manually identify ~ 500 locations and compared with the dataset of NHDplus slope and GRADES dataset, found the consistent of two datasets. Therefore, we also applied the slope results of GRADES for our estimation CO<sub>2</sub> emissions in higher stream orders while the 1<sup>st</sup> order estimated from EU-Hydro-River Network Database Version 1.3, and the EU-DEM v1.0 dataset (EEA, 2022).

## 1.3 water surface area calculation

Water surface area of the Elbe River was scaled through river length and river width reference to three products of the river network of EU-Hydro, HydroRIVERS (Lehner and Grill, 2013), and MERIT-Basins . By the comparison of three different rivers network maps, we found that the MERIT-Basins and HydroSHEDS have a similar river network structure and Strahler orders. Previous studies showed that the HydroSHEDS usually underestimates the 1<sup>st</sup> Strahler order (Raymond et al., 2013) while the EU-Hydro-River dataset could be more representative of the observed river network.

Therefore, the length of the Elbe River within different Strahler orders was calculated by MERIT-Hydro in higher Strahler orders while the 1<sup>st</sup> order was by the EU-Hydro-River. Totally, 3250 river reaches with 41,548,000 discharge data was extracted from GRADES for the scale of the annual water surface area of the Elbe River. Besides, we estimate the width of the 1<sup>st</sup> order from the Log relationship between stream order and river width from higher orders.

The river width was calculated by the equation from Raymond et al. 2012 ( $\ln \text{width} = 0.423 \times \ln Q + 2.56$ ). The annual flow discharge was also resampled from the daily GRADES discharge, in combination with the river length from the MERIT-Basins dataset. Finally, we calculated an annual average total surface area of the Elbe River was  $735 \pm 57 \text{ km}^2$  from 1984 to 2018, accounting for about 0.5 % of the basin area (Table S1).

## 1.4 F<sub>CO2total</sub> estimation

Rivers with a low Strahler order often contribute more to CO<sub>2</sub> emissions than high order rivers. This is because they have a larger water surface area, are closer connection to the soil, and have more turbulence due to a steeper slope (Butman and Raymond, 2011; Marx et al., 2017; Ran et al., 2021). Therefore, significant underestimations of the emissions could result from the use of only points in the high order rivers to calculate CO<sub>2</sub> emission for the entire basin.

To estimate emissions from high order rivers (Strahler orders 6, 7, and 8), the annual water surface area and average annual  $F_{CO_2}$  from 1990 to 2018 were used. It was calculated that the highest order rivers released  $0.31 \pm 0.27 \text{ Tg C yr}^{-1}$  between 1984 and 2018.

To estimate  $CO_2$  emissions from medium order rivers (Strahler orders 4,5), the percentages from Butman and Raymond (2011) and Ran et al. (2021) were applied, which showed that these rivers constituted 13% and 29% of the total river network, respectively. The  $CO_2$  efflux data from the high order rivers were then used to estimate the emissions from the medium order rivers.

For the small rivers (Strahler orders 1,2,3), it was assumed that  $CO_2$  emissions have not changed since the 1990s due to the relatively low impact of human activities on these rivers. During the estimation, the  $CO_2$  emissions from 2018 was identified as the year with the lowest human impact. The  $CO_2$  emission of  $0.7 \text{ Tg C yr}^{-1}$  was applied for the reference value of small rivers of the Elbe River. Finally, the estimation shows that  $CO_2$  emissions from the Elbe rivers were  $1.3 \pm 1.3 \text{ Tg C}$  in 2018. This is much lower than before 1990 ( $3.6 \pm 1.5 \text{ Tg C}$ ), but it's still 3.5 times the DIC loads to the Elbe estuary (Figure 3a).

## 2. Loads estimation

The fluxes of dissolved inorganic carbon (DIC), dissolved organic carbon (DOC), and particulate organic carbon (POC) were scaled from the 1990s to 2018 in the Elbe River at Geesthacht station to serve as a basis for comparison with  $CO_2$  efflux. The carbon loads to the Elbe estuary were calculated using two curve-fitting methods.

The first method was based on the segmented log-log relationship between concentration (C) and instant flow discharge (Q) (Bakhmeteff, 1912). The datasets were divided into two segments using the median Q value, denoted as  $b_{50inf}$  (when  $Q < Q_{median}$ ), and  $b_{50sup}$  (when  $Q > Q_{median}$ ) (Meybeck and Moatar, 2012). The second estimation was conducted using LOADEST, which incorporates nine different models, including the log-log relationship (Runkel et al., 2004). The software automatically selected the best model based on residual values.

In the comparison of these two methods, our analysis revealed that both approaches showed promising linear relationships (Figures S4). Therefore, we determined the average value as the final result for estimating the annual load to the coastal region.

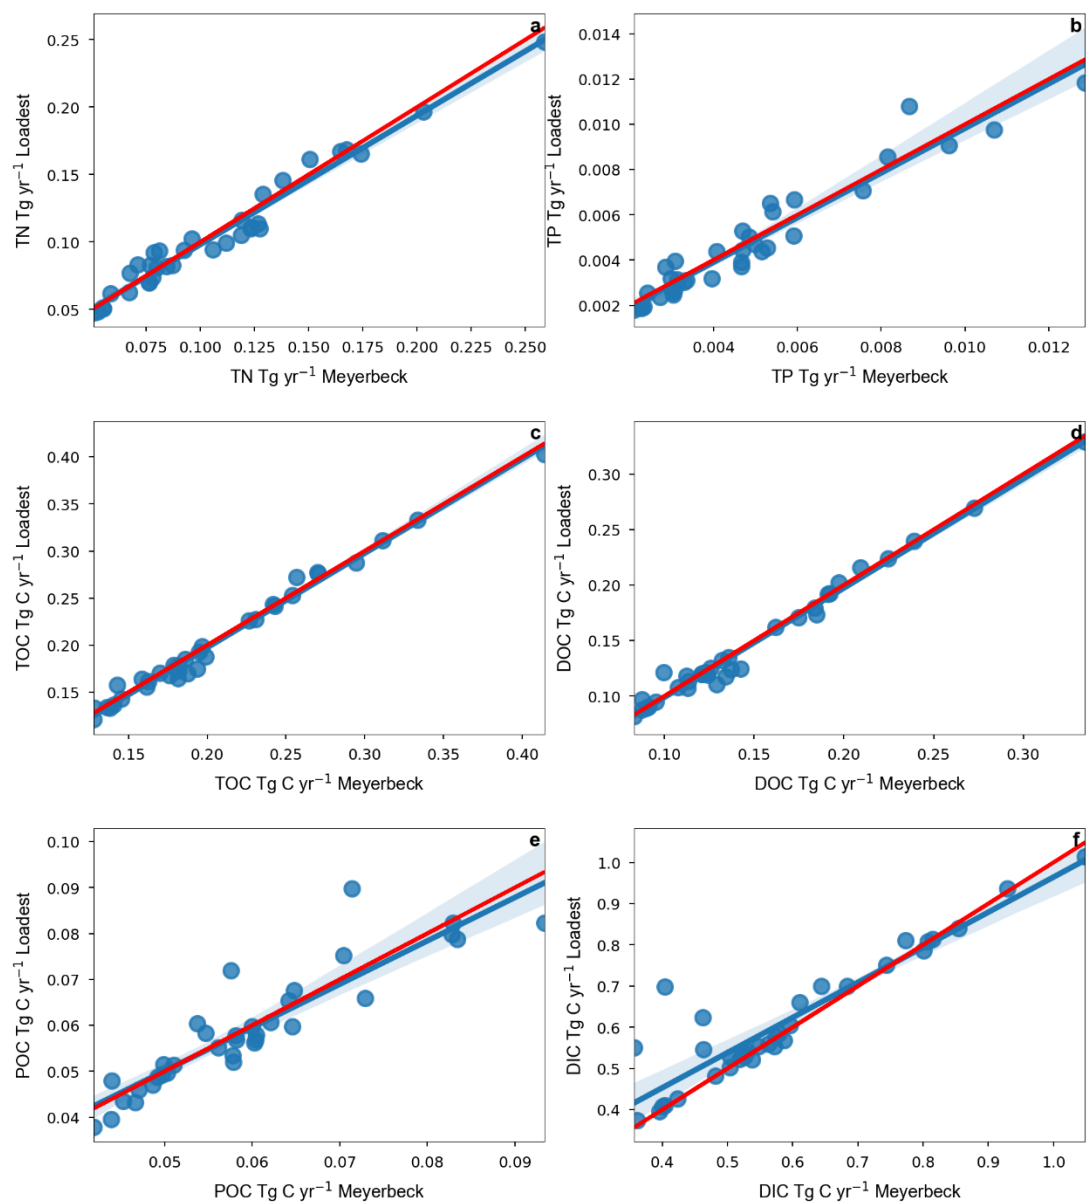

Figure S5 Comparison of different load calculation methods (x: Meyerbeck and Moatar; y: Loadest)

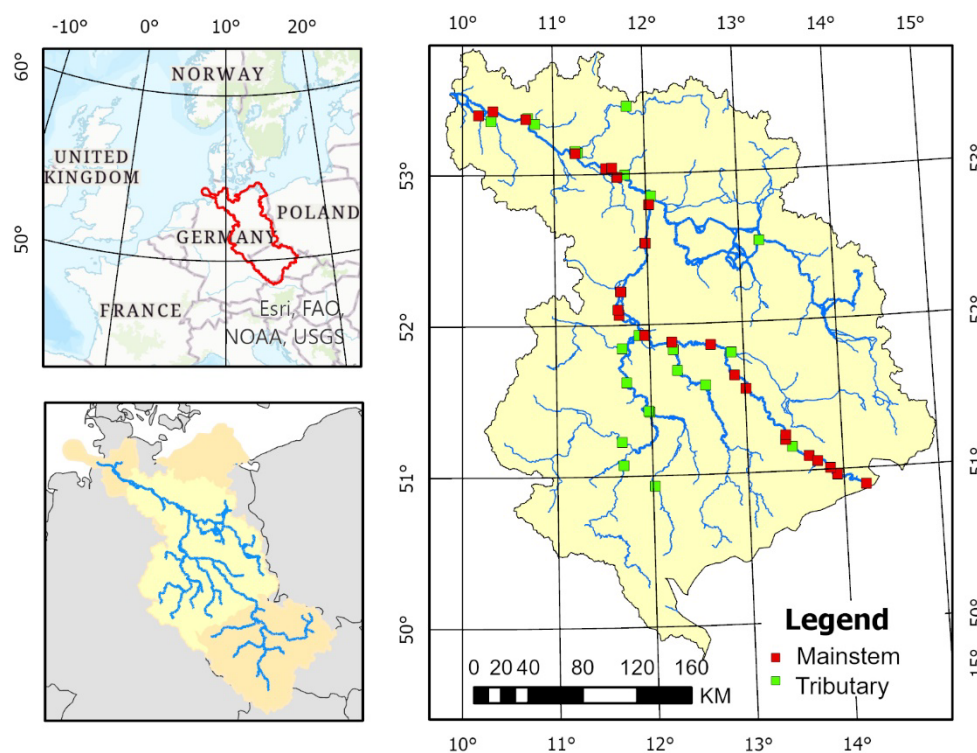

Figure S1 locations of the sample stations in the Elbe River

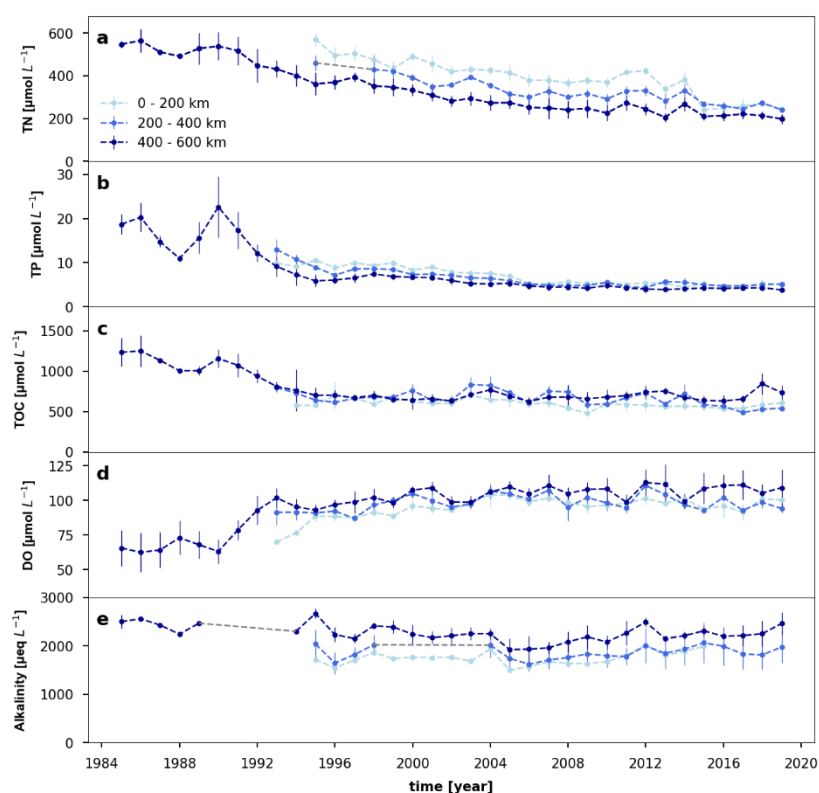

Figure S2 Long term trends in water quality in the Elbe from the 1990s to 2018: (a) TN, (b) TP, (c) TOC, (d) DO%, (e) Alkalinity. Values are annual mean with standard deviation indicating spatial

variations within mainstem. The red/green/blue dots represent the distance of 0-200/200-400/400-600 km to Germany/Czech boundary.

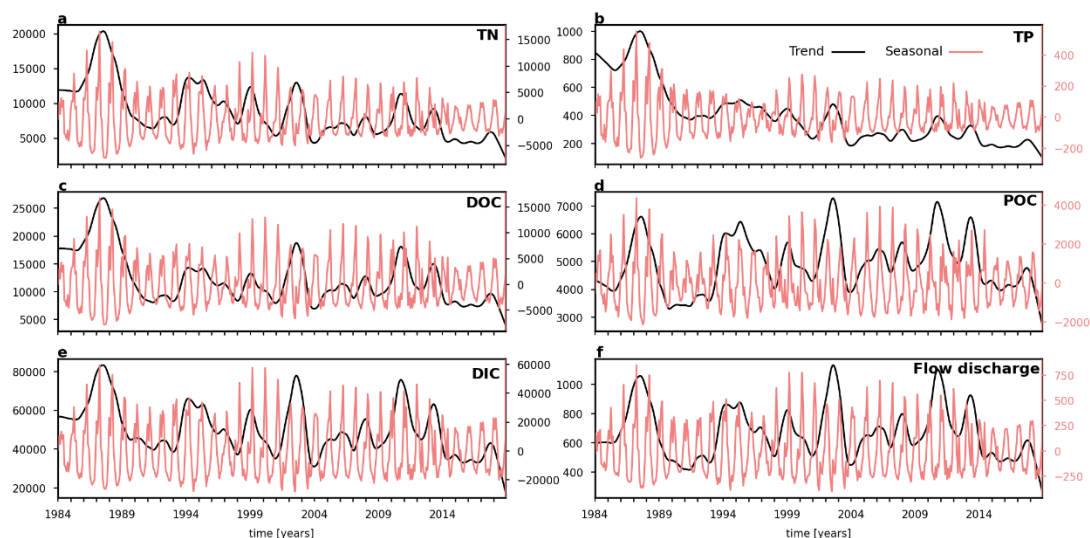

Figure S3, Seasonal decomposition of monthly sum loads of: (a)TN ( $10^4$ -ton month $^{-1}$ ); (b)TP ( $10^4$ -ton month $^{-1}$ ); (c)DOC ( $10^4$ -ton month $^{-1}$ ); (d) POC ( $10^4$ -ton month $^{-1}$ ), (e) DIC ( $10^4$ -ton month $^{-1}$ ), and (f) Flow discharge ( $\text{m}^3 \text{s}^{-1}$ ); where the black line represents the trends after seasonal decomposition, the coral line represents the seasonal components after seasonal decomposition

## References

- Amann, T., Weiss, A., and Hartmann, J.: Inorganic Carbon Fluxes in the Inner Elbe Estuary, Germany, *Estuaries and Coasts*, 38, 192-210, 10.1007/s12237-014-9785-6, 2014.
- Bakhmeteff, B.: Varied flow in open channel, St Petersburg, Russia, 1912.
- Butman, D. and Raymond, P. A.: Significant efflux of carbon dioxide from streams and rivers in the United States, *Nature Geoscience*, 4, 839-842, 10.1038/ngeo1294, 2011.
- EEA: European Environment Agency. URL: <https://www.eea.europa.eu/> (accessed on 2022-10-18), 2022.
- Lehner, B. and Grill, G.: Global river hydrography and network routing: baseline data and new approaches to study the world's large river systems, *Hydrological Processes*, 27, 2171-2186, 10.1002/hyp.9740, 2013.
- Lewis, E. and Wallace, D.: Program developed for CO<sub>2</sub> system calculations, Environmental System Science Data Infrastructure for a Virtual Ecosystem ..., 1998.
- Lin, P., Pan, M., Beck, H. E., Yang, Y., Yamazaki, D., Frasson, R., David, C. H., Durand, M., Pavelsky, T. M., Allen, G. H., Gleason, C. J., and Wood, E. F.: Global Reconstruction of Naturalized River Flows at 2.94 Million Reaches, *Water Resour Res*, 55, 6499-6516, 10.1029/2019WR025287, 2019.
- Liu, S., Kuhn, C., Amatulli, G., Aho, K., Butman, D. E., Allen, G. H., Lin, P., Pan, M., Yamazaki, D., Brinkerhoff, C., Gleason, C., Xia, X., and Raymond, P. A.: The importance of hydrology in routing terrestrial carbon to the atmosphere via global streams and rivers, *Proc Natl Acad Sci U S A*, 119, e2106322119, 10.1073/pnas.2106322119, 2022.
- Marx, A., Dusek, J., Jankovec, J., Sanda, M., Vogel, T., van Geldern, R., Hartmann, J., and Barth, J. A. C.: A review of CO<sub>2</sub> and associated carbon dynamics in headwater streams: A global perspective, *Reviews of Geophysics*, 55, 560-585, 10.1002/2016rg000547, 2017.
- Meybeck, M. and Moatar, F.: Daily variability of river concentrations and fluxes: indicators based on the

segmentation of the rating curve, *Hydrological Processes*, 26, 1188-1207, 10.1002/hyp.8211, 2012.

Parkhurst, D. L. and Appelo, C.: User's guide to PHREEQC (Version 2): A computer program for speciation, batch-reaction, one-dimensional transport, and inverse geochemical calculations, *Water-resources investigations report*, 99, 312, 1999.

Ran, L., Butman, D. E., Battin, T. J., Yang, X., Tian, M., Duvert, C., Hartmann, J., Geeraert, N., and Liu, S.: Substantial decrease in CO<sub>2</sub> emissions from Chinese inland waters due to global change, *Nat Commun*, 12, 1730, 10.1038/s41467-021-21926-6, 2021.

Raymond, P. A., Hartmann, J., Lauerwald, R., Sobek, S., McDonald, C., Hoover, M., Butman, D., Striegl, R., Mayorga, E., Humborg, C., Kortelainen, P., Durr, H., Meybeck, M., Ciais, P., and Guth, P.: Global carbon dioxide emissions from inland waters, *Nature*, 503, 355-359, 10.1038/nature12760, 2013.

Runkel, R. L., Crawford, C. G., and Cohn, T. A.: Load Estimator (LOADEST): A FORTRAN program for estimating constituent loads in streams and rivers 2328-7055, 2004.

Yamazaki, D., Ikeshima, D., Sosa, J., Bates, P. D., Allen, G. H., and Pavelsky, T. M.: MERIT Hydro: A High-Resolution Global Hydrography Map Based on Latest Topography Dataset, *Water Resources Research*, 55, 5053-5073, 10.1029/2019wr024873, 2019.
