# Supplementary material for: Long-term reduction in CO 2 emissions from the Elbe River due to water quality improvement
Source: Copernicus journal article supplement (doi:10.5194/bg-2023-131), 2023-08-15
Supplement: Supplementary file 1 [file Supplementary tables s1 and s2.xls]

## Sheet: table s1
Year	TN_umol_L	TP_umol_L	TOC_umol_L	DOSAT_pcent	pCO2_uatm	FCO2_mmol_m2_d	Area_km2	FCO2_E_TgC_yr_	DOC_TgC_yr	POC_TgC_yr	DIC_TgC_yr
1984	548±15	19±2	1235±175	74±16	7878±4875	706±424	698±200	3.8±1.7	0.21±0.04	0.05±0.05	0.67±0.1
1985	565±55	20±3	1252±196	70±15	9334±1681	749±153	687±180	4.1±0.7	0.2±0.06	0.04±0.03	0.64±0.16
1986	511±2	15±1	1135±19	74±15	5900±1055	465±94	735±196	3.0±0.5	0.24±0.06	0.06±0.04	0.75±0.12
1987	492±7	11±1	1006±1	76±10	7658±992	629±92	874±222	4.3±0.8	0.33±0.06	0.08±0.05	1.03±0.13
1988	528±73	16±4	1007±59	73±11	5157±1395	390±142	824±204	2.8±0.7	0.27±0.08	0.07±0.07	0.85±0.09
1989	539±65	20±7	1159±109	72±12			680±185		0.18±0.07	0.05±0.04	0.56±0.08
1990	517±66	13±5	1074±145	80±5			658±176		0.11±0.04	0.04±0.05	0.55±0.11
1991	448±78	10±4	940±83	90±8			643±169		0.09±0.02	0.04±0.04	0.45±0.09
1992	432±39	10±3	837±105	93±12			694±178		0.12±0.03	0.05±0.07	0.54±0.12
1993	401±50	8±3	700±142	91±8			700±187		0.11±0.02	0.05±0.07	0.5±0.17
1994	446±137	8±3	623±93	90±5	2652±573	189±46	802±193	1.8±0.3	0.17±0.03	0.07±0.07	0.79±0.24
1995	375±116	7±2	662±102	92±6	3242±1867	243±160	804±212	2.0±0.7	0.18±0.02	0.08±0.1	0.79±0.19
1996	382±142	7±2	661±69	91±9	2688±1125	197±95	742±208	1.8±0.5	0.13±0.02	0.06±0.05	0.58±0.11
1997	385±129	8±2	642±99	95±6	2410±1745	171±148	716±187	1.7±0.8	0.12±0.03	0.06±0.08	0.53±0.16
1998	374±96	7±2	662±104	95±7	1676±703	108±60	738±199	1.3±0.3	0.13±0.04	0.06±0.04	0.56±0.07
1999	360±112	6±2	662±124	99±8	1647±834	99±63	766±185	1.4±0.5	0.13±0.03	0.06±0.06	0.6±0.13
2000	321±107	7±2	623±80	98±8	1857±847	119±70	719±193	1.4±0.3	0.12±0.07	0.06±0.05	0.52±0.13
2001	330±97	6±2	608±98	94±5	1796±572	118±47	709±190	1.3±0.2	0.11±0.01	0.06±0.06	0.5±0.13
2002	348±96	6±2	740±169	96±6	1537±462	96±38	871±240	1.3±0.2	0.22±0.1	0.09±0.12	0.93±0.25
2003	311±116	6±2	706±171	102±8	966±938	49±75	696±169	1.1±0.4	0.12±0.01	0.05±0.08	0.52±0.26
2004	287±97	5±1	669±108	103±8	1244±1126	72±94	683±181	1.1±0.5	0.09±0.02	0.05±0.06	0.43±0.2
2005	265±91	5±1	609±82	99±7	1155±918	64±74	711±194	1.1±0.4	0.13±0.02	0.06±0.05	0.55±0.08
2006	274±90	4±1	666±113	103±10	1338±1466	79±118	731±201	1.2±0.5	0.14±0.03	0.06±0.05	0.58±0.11
2007	274±77	5±1	650±149	97±9	1550±1695	93±139	734±203	1.2±0.6	0.13±0.01	0.06±0.04	0.58±0.07
2008	279±86	5±1	586±113	100±8	1409±727	83±59	746±184	1.2±0.3	0.12±0.02	0.06±0.08	0.54±0.1
2009	255±89	5±1	596±130	98±11	2198±2266	148±186	733±202	1.5±0.9	0.12±0.02	0.06±0.06	0.53±0.14
2010	298±89	4±1	650±130	95±6	2142±1909	143±157	814±204	1.6±0.8	0.19±0.04	0.08±0.09	0.81±0.23
2011	284±103	4±1	655±169	100±12	2354±2438	162±207	767±188	1.6±1.1	0.16±0.02	0.07±0.14	0.69±0.18
2012	271±77	4±1	584±147	99±12	2110±2056	141±173	697±184	1.4±0.7	0.12±0.01	0.06±0.05	0.53±0.07
2013	289±101	4±1	633±135	94±8	2237±2028	155±174	813±210	1.6±1.0	0.19±0.03	0.08±0.06	0.81±0.19
2014	222±76	4±1	575±111	94±11	2384±1932	163±160	685±181	1.5±0.7	0.09±0.01	0.05±0.05	0.4±0.08
2015	226±66	4±1	575±82	98±11	1862±1595	119±136	677±168	1.3±0.6	0.09±0.01	0.05±0.05	0.4±0.11
2016	221±72	4±1	583±127	96±12	2219±1733	153±145	707±187	1.5±0.7	0.09±0.01	0.05±0.04	0.41±0.07
2017	246±64	4±1	695±216	96±10	1950±1660	130±142	764±192	1.4±0.7	0.11±0.01	0.06±0.04	0.48±0.09
2018	213±71	4±1	637±123	97±11	1832±1442	118±126	701±193	1.3±0.6	0.08±0.01	0.04±0.07	0.37±0.1

## Sheet: table s2
Year	categroy	TN_umol_L	TP_umol_L	TOC_umol_L	DOSAT_pcent	pCO2_uatm	FCO2_mmol_m2_d
1984	mainstem	548±15	19±2	1235±175	66±13	10820±6054	861±464
1985	mainstem	565±55	20±3	1252±196	63±14	8283	636
1986	mainstem	511±2	15±1	1135±19	64±13	6657±700	533±63
1987	mainstem	492±7	11±1	1006±1	73±12	7469±1024	607±99
1988	mainstem	528±73	16±4	1007±59	68±10	4691	356
1989	mainstem	539±65	23±7	1159±109	63±9
1990	mainstem	517±66	17±4	1074±145	79±7
1991	mainstem	448±78	12±2	940±83	93±10
1992	mainstem	432±39	11±3	802±58	93±13
1993	mainstem	401±50	9±2	710±125	91±8	1501	96
1994	mainstem	476±103	9±2	618±74	90±4	2520±401	181±34
1995	mainstem	424±73	7±1	662±98	93±5	3264±1981	241±168
1996	mainstem	445±63	8±2	667±23	92±8	2710±956	197±79
1997	mainstem	420±67	9±1	663±54	97±6	1991±1187	135±98
1998	mainstem	400±50	8±1	673±38	97±6	1416±373	86±30
1999	mainstem	397±64	7±1	694±101	103±6	1145±289	66±24
2000	mainstem	364±65	8±1	635±53	101±7	1474±434	91±35
2001	mainstem	358±62	7±1	624±48	96±4	1655±466	106±38
2002	mainstem	367±62	6±1	758±89	98±3	1424±432	86±35
2003	mainstem	346±65	6±1	759±119	106±6	618±317	21±26
2004	mainstem	323±64	6±1	694±70	107±4	822±391	38±33
2005	mainstem	300±63	5±1	613±48	102±5	875±439	41±36
2006	mainstem	305±69	5±1	685±86	107±7	836±365	38±30
2007	mainstem	292±61	5±1	664±133	100±8	980±604	49±49
2008	mainstem	302±64	5±1	591±96	103±7	1126±417	62±34
2009	mainstem	286±68	5±1	633±81	102±8	1202±565	68±47
2010	mainstem	321±62	4±0.5	668±64	97±5	1375±388	82±33
2011	mainstem	314±83	4±1	694±103	109±8	1078±225	57±18
2012	mainstem	269±64	5±1	652±99	105±11	970±357	47±29
2013	mainstem	314±59	4±1	655±79	99±4	1286±325	74±27
2014	mainstem	232±27	5±1	605±59	101±11	1406±686	83±55
2015	mainstem	233±29	4±0.4	592±70	105±10	877±316	39±25
2016	mainstem	235±28	4±0.4	591±86	102±12	1183±382	66±32
2017	mainstem	243±34	5±1	702±182	102±6	955±183	46±15
2018	mainstem	220±28	4±1	656±110	102±11	897±398	40±32
1984	tributary				87±14	4935±84	396
1985	tributary				80±11	9860±1999	806±167
1986	tributary				87±6	5143±746	396±61
1987	tributary				80±8	7752±1119	643±106
1988	tributary				79±9	5313±1666	408±197
1989	tributary		14		81±6
1990	tributary		9±2		81±3
1991	tributary		9±5		87±4
1992	tributary		9±5	1045±68	93±10
1993	tributary		6±3	669±205	90±8
1994	tributary	334±201	5±2	636±132	90±7	2949±797	210±68
1995	tributary	204±55	5±2	664±120	87±8	3186±1649	249±147
1996	tributary	217±164	5±2	651±114	88±10	2653±1432	196±127
1997	tributary	297±200	5±2	590±157	92±7	3249±2390	253±210
1998	tributary	312±146	5±2	637±190	90±7	2152±939	156±84
1999	tributary	271±153	4±2	591±145	90±5	2569±696	173±62
2000	tributary	210±116	5±2	596±123	90±4	2698±966	194±92
2001	tributary	256±134	4±2	570±165	90±6	2718±36	194±1
2002	tributary	307±142	4±2	703±271	90±6	2045±88	139±10
2003	tributary	231±165	4±2	594±215	94±5	2068±1393	137±112
2004	tributary	194±108	4±2	612±156	92±5	2846±1599	205±134
2005	tributary	187±98	4±1	599±138	92±7	2416±1488	166±121
2006	tributary	200±94	4±1	618±159	91±4	3246±2451	232±197
2007	tributary	242±96	4±1	623±178	90±6	3099±2656	231±232
2008	tributary	238±107	4±2	577±146	93±4	2176±864	151±71
2009	tributary	207±97	4±2	540±170	91±12	3992±3040	310±251
2010	tributary	266±111	4±1	625±187	92±8	3446±2694	259±227
2011	tributary	251±114	4±2	617±214	92±8	3759±2996	290±260
2012	tributary	273±93	4±2	516±160	92±10	3250±2425	243±207
2013	tributary	268±124	4±1	615±167	91±8	3274±2581	252±226
2014	tributary	214±99	4±1	553±136	90±8	3362±2290	251±192
2015	tributary	221±86	4±1	561±90	93±9	2649±1782	190±155
2016	tributary	210±93	3±1	578±152	92±10	2945±1955	220±165
2017	tributary	248±80	4±1	690±243	90±9	2614±1887	193±164
2018	tributary	207±92	3±1	624±133	92±9	2352±1565	167±139
