# Supplementary material for: Long-term reduction in CO 2 emissions from the Elbe River due to water quality improvement
Source: Copernicus journal article supplement (doi:10.5194/bg-2023-131), 2023-08-15
Supplement: Supplementary file [file bg-2023-131-AC1-supplement.pdf]

1 Reviewer comments

2 Author responses

3

4 **RC1**

5

6 MAJOR COMMENTS

7

8 Long-term patterns of CO<sub>2</sub> levels and emissions in rivers have been reported by several  
9 studies (Jones et al. 2003; Ran et al. 2015; 2021; Nydahl et al. 2017; Marescaux et al.  
10 2018) (non-exhaustive list). Findings from these studies could be used to contextualize the  
11 present study (Introduction) and to discuss differences or convergences by comparison  
12 (Discussion).

13

14 Reply:

15 Thank you for the references.

16

17 In the introduction, we will include a paragraph reviewing the literature on long-term CO<sub>2</sub>  
18 emission patterns. In the discussion, we will draw on previous studies to compare with our  
19 findings and examine time-dependent variations in region-specific attributes.

20

21 L 30: « water pollution » is extremely vague. This should be broken down into several  
22 human impacts on riverine systems that do not necessarily lead to the same change in  
23 CO<sub>2</sub> emissions. Eutrophication (increase of nutrient inputs) can potentially lead to  
24 enhanced primary production and a CO<sub>2</sub> sink in impounded large rivers such as the  
25 Mississippi (Crawford et al. 2016). Conversely, croplands seem to also lead to enhanced  
26 organic carbon inputs from soils enhancing CO<sub>2</sub> emissions compared to more natural land  
27 cover such as forests (Borges et al. 2018; Mwanake et al. 2023) Wastewater inputs lead  
28 to CO<sub>2</sub> production in the river, although this impact seems very local, in the near vicinity of  
29 the emissary (Marescaux et al. 2018).

30

31 Reply:

32 Thank you. We agree with you that “water pollution” is indeed a broad term, and it is  
33 important to consider its impacts on riverine CO<sub>2</sub> emissions from various perspectives.

34

35 Accordingly, we will expand our description to encompass different viewpoints, including  
36 the effects of organic carbon from agricultural runoff and domestic sewage (Borges et al.,  
37 2018; Marescaux et al., 2018; Mwanake et al., 2023), as well as the carbon sink impact  
38 attributable to eutrophication caused by increased nutrient levels (Crawford et al., 2016).

39

40 L 30 “this percentage continues to increase because the unprecedented anthropogenic  
41 stresses on riverine systems have led to many negative issues such as water pollution”.  
42 I’m not sure this statement applies assertively to all climate zones (Crawford et al., 2016).  
43 According to Liu et al. (2022), tropical rivers are responsible for 57% of the riverine CO<sub>2</sub>  
44 global emission, followed by temperate (30%) and Arctic regions (13%). The most direct

45 anthropogenic impacts expected to affect riverine CO<sub>2</sub> emissions should occur at  
46 temperate latitudes (North America, Europe and parts of Asia) that account for less than a  
47 third of total emissions. Note that this percentage was lower in earlier estimates for which  
48 tropical rivers accounted for 80% of riverine CO<sub>2</sub> emissions (Raymond et al. 2013;  
49 Laueward et al. 2015).

50

51 Reply:

52 Thank you. We agree that the impacts of river pollution and restoration efforts on riverine  
53 CO<sub>2</sub> emissions, which result from human activities, should be concentrated in regions with  
54 high population density.

55

56 We will revise the sentence to offer a more accurate depiction that incorporates the  
57 suggestions you have provided.

58

59 L 34: Rivers do not have “ecosystem's natural carbon absorption and storage capabilities”.  
60 Rivers do not store carbon in sediments and do not “absorb” carbon on contrary tend to  
61 emit CO<sub>2</sub> to the atmosphere. High CO<sub>2</sub> over-saturation in rivers occurs ubiquitously even  
62 in pristine (or near pristine) river basins such as the Amazon and Congo.

63

64 Reply:

65 Thank you very much for the correction. We agree that most rivers consistently serve as a  
66 source of carbon.

67

68 We will revise the text from this perspective.

69

70 L 37: It has been argued that CO<sub>2</sub> emissions from lowland rivers in particular in the tropics  
71 are related to inputs from wetlands (Abril et al. 2014; Borges et al. 2015) that are  
72 conceptually different (Abril and Borges 2019) from “terrestrial organic carbon (OC)» (as  
73 stated).

74

75 Reply:

76 Thank you for the correction. We will add the reference and the information.

77

78 L38: Can you please clarify the role of «nutrient availability” in this context?

79

80 Reply:

81 We will delete the term "Nutrient availability" here, as it is misleading in this context.

82

83 L44-46: This argument is awkward. DOM produced by phytoplankton should indeed  
84 sustain microbial respiration but phytoplankton also photosynthesized prior to DOM  
85 release, so both effects should cancel each other in terms of net carbon fluxes.

86

87 Reply:

88 Thank you. The sentence will be deleted.

89 L 44: reference to “lakes and reservoirs » seems to be out of context here.

90

91 Reply:

92 Will be rephrased.

93

94 L49-50: statement “trophic status related to nutrient availability significantly impacts the  
95 levels of CO<sub>2</sub> in rivers” is contradicted by the fact that CO<sub>2</sub> emissions in rivers are in  
96 majority related to lateral inputs of carbon from soils and ground-waters (Hotchkiss et al.  
97 2015) or from wetlands (Abril and Borges 2019), and are not related to in-stream CO<sub>2</sub>  
98 production from metabolism (Hotchkiss et al. 2015; Abril et al. 2014; Borges et al. 2019).

99

100 Reply:

101 In this study, Figures 3c and 3d demonstrate the significant and negative correlation  
102 between RUE (the ratio of Chl-a to nutrient concentrations) and pCO<sub>2</sub>.

103

104 The sentence will be rephrased deleting the terms ‘trophic status related nutrient  
105 availability’ and replaced by ‘nutrient concentration’.

106

107 L 51: reference to “biodiversity” seems out of context here.

108

109 Reply:

110 Will be rephrased.

111

112 L 55: The authors should cite the “existing studies” they critique rather than stating this in  
113 a vague way.

114

115 Reply:

116 Thank you. Related studies will be cited (like Nydahl et al. (2017); Marescaux et al. (2018)  
117 etc.)

118

119 L 55: Please clarify what is meant by “short term effects »? “effects” of what on what? Do  
120 you mean short-term time-series? Some studies have reported relatively long time series  
121 (Jones et al. 2003; Ran et al. 2015; 2021; Nydahl et al. 2017; Marescaux et al. 2018). It is  
122 not necessary to downplay existing literature to put forward your own study.

123

124 Reply:

125 Thank you. In our study, "Short-term effects" is a relative term compared with continuous  
126 long term time series, refers to the analysis of F<sub>CO<sub>2</sub></sub> or CO<sub>2</sub> efflux below 10 years (decadal).  
127 Will be clarified.

128

129 For the research you provided, While Ran et al. (2015) provided extensive data on long-  
130 term pCO<sub>2</sub>, they did not conduct analyses related to F<sub>CO<sub>2</sub></sub>. After that, Ran et al. (2021)  
131 compared CO<sub>2</sub> efflux from the average of two periods (1980s to the 2010s) but did not offer  
132 an exhaustive continuous time series analysis. Similarly, the work of Nydahl et al. (2017)

133 and Marescaux et al. (2018) was primarily directed towards understanding pCO<sub>2</sub> dynamics,  
134 with less emphasis on F<sub>CO2</sub>. As a result, there is a research gap in continuous and long-  
135 term analyses of F<sub>CO2</sub> and CO<sub>2</sub> efflux, which our research questions aim to address. Will  
136 be rephrased and related studies will be included.

137

138 L 55: What do you mean by «hydrological conditions»? CO<sub>2</sub> emissions from rivers depend  
139 on CO<sub>2</sub> concentration between water and air, and on the gas transfer velocity. Both are  
140 more or less indirectly linked to “hydrological conditions” but this should be clarified,  
141 especially when criticizing “existing studies”.

142

143 Reply:

144 Thank you. In this research, we are using estimates of both the flow discharge and flow  
145 velocity for the estimation of the gas transfer velocity and water surface area. The  
146 parameters represent hydrological conditions.

147 This aspect will be clarified in the text.

148

149 L61: Please provide a reference to back this statement, and clarify compared to which  
150 other rivers was it the most polluted? At European level? Globally? It could be also useful  
151 to take into account size effects. A very small stream can be extremely impacted by  
152 wastewater from a small village, while very large rivers are unaffected by large cities  
153 because all inputs are diluted by high discharge.

154

155 Reply:

156 Thank you. Before 1990, the Elbe River was one of the most polluted rivers in European  
157 scale. Related references will be added (ICPER, 2023; Kempe, 1982).

158

159 L 163: the equation relating river width and Q given by Raymond et al. (2012) was derived  
160 for small streams. Can you comment on its applicability to large rivers? Also this relation is  
161 probably affected by channelization and probably does not apply to highly engineered  
162 rivers such as the Elbe.

163

164 Reply:

165 Most of the Elbe River's flow, categorized with Strahler orders from 1 to 6, matches the  
166 flow discharge range used to create the equation by Raymond et al. (2012) (Figure R1).

167

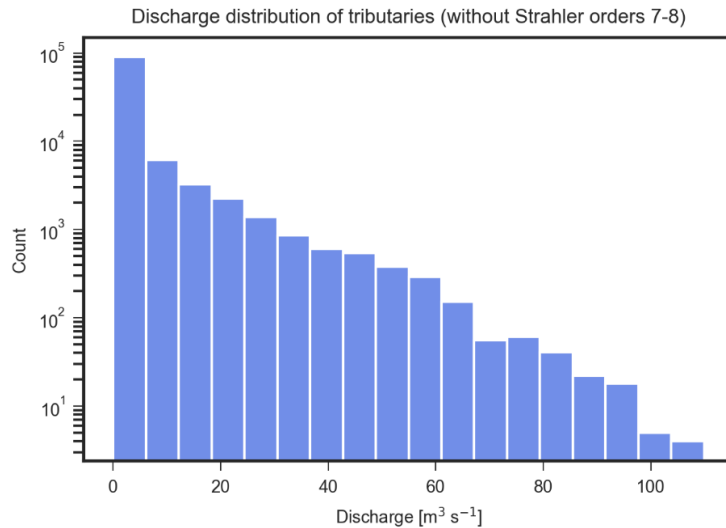

168

169 Figure R1. Flow discharge distribution of tributaries of the Elbe River. Discharge data obtained and  
 170 resampled from GRADES (The Global Reach-scale A priori Discharge Estimates for SWOT) (Lin et al.,  
 171 2019; Yang et al., 2019).

172

173 For the larger segments of the river, classified as Strahler orders 7 and 8, primarily the  
 174 mainstem, we compared our estimated river widths with the research of Mallast et al.  
 175 (2020). Their measurements were derived from satellite imagery. The average river width  
 176 we estimated showed good agreement with their findings (this research: 177 m for Strahler  
 177 order 7&8 (Figure R2), versus Mallast et al. (2020): 183 m, with an area of 107 km<sup>2</sup> divided  
 178 by a length of 594 km).

179

180 Therefore, we believe the error introduced by our method in this research should be minor.  
 181 An additional discussion of uncertainties will be added.

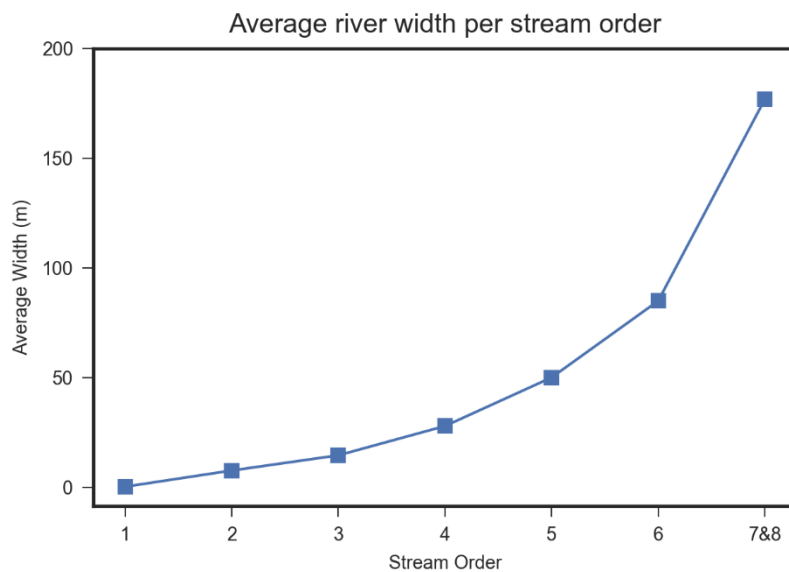

182

183 Figure R2: Estimated River width across different Strahler orders.

184 L 300: can you please provide a numerical comparison and a reference for the data for  
185 the 1954–1977 period?

186

187 Reply:

188 The modeled pCO<sub>2</sub> and the corresponding data and plot will be added.

189

190 Can you please explain somewhere in text why the analysis was not extended back to  
191 1954 and only started in 1984?

192

193 Reply:

194 Since our study conducted a temporal and spatial analysis. In this process, we integrated  
195 a range of environmental indicators along with carbon. On the other hand, the data from  
196 1954 was restricted to just one site (sample location of the local water works company  
197 Hamburg Wasser) and did not provide any environmental indicators (Kempe, 1982).

198

199 Consequently, we employed this data merely as a background reference value. A short  
200 explanation will be added.

201

202 L341-344: This statement does not seem relevant. Indeed, it is conceivable that light  
203 absorption by CDOM limits photosynthesis from aquatic primary producers, but in rivers  
204 CDOM mostly originates from soils. Also, DOM from phytoplankton is usually very labile  
205 and is quickly consumed by micro-organisms. CDOM is usually related to highly  
206 refractory substances, typically from soils.

207

208 Reply:

209 The sentence will be deleted.

210

211 L 370-373: Please clarify the text of the two hypothesis and also provide extra arguments  
212 and references to back them.

213

214 Reply:

215 The two main arguments are as follows:

216

217 Firstly, the treatment of municipal wastewater has resulted in a decrease in the amount of  
218 labile organic carbon being directly introduced into the river, thereby reducing the potential  
219 for its degradation into CO<sub>2</sub> (Lasaki et al., 2023). Secondly, the reduced discharge of heavy  
220 metals, along with reductions in nitrogen and phosphorus concentrations, has promoted a  
221 healthier aquatic ecosystem (Qasem et al., 2021). Although photosynthesis and respiration  
222 processes may balance each other, the net growth of aquatic plants contributes to the  
223 overall reduction of CO<sub>2</sub> in the river if the rate of plant growth exceeds the rate of  
224 decomposition of plant residues (Demars et al., 2016).

225

226 Will be clarified with extra arguments and references.

227

228 What do you mean by “biomass amount » and why should it not increase in « restored  
229 aquatic system”?

230

231 Reply:

232 The most important factor affecting biomass quantity is the toxicity from heavy metals,  
233 which impedes biomass growth. As environmental conditions shift from polluted to non-  
234 polluted states, the quantity of biomass is expected to change, subsequently influencing  
235 CO<sub>2</sub> levels. However, heavy metals primarily originate from industrial inputs, and the  
236 closure of factories along with advanced wastewater treatment technologies has  
237 significantly improved water quality (Amann et al., 2012). Since trace elements do not  
238 exceed the thresholds that limit phytoplankton growth, biomass remains relatively stable.

239

240 Will be rephrased. And a plot of temporal biomass amount variations will also be provided.

241

242 What do you mean by “challenging through water quality treatments.”

243

244 Reply:

245 The challenge could be that CO<sub>2</sub> emissions from sewage water discharge may be avoided  
246 at the cost of CO<sub>2</sub> emission of wastewater treatment plants through biological treatment  
247 process and electricity consumption.

248

249 According to global estimates, the degradation of OC during wastewater treatment in 2010  
250 contributed to approximately 770 Tg CO<sub>2</sub>-equivalent GHG emissions, representing nearly  
251 1.57% of the total global GHG emissions of 49,000 Tg CO<sub>2</sub> (Edenhofer, 2015).

252

253 On the other hand, the oxidized and anaerobic digestion of the organic carbon of  
254 wastewater is converted mainly to CO<sub>2</sub> and CH<sub>4</sub> (Campos et al., 2016), thus offsetting the  
255 reduction in CO<sub>2</sub> in wastewater treatment.

256

#### 257 MINOR COMMENTS

258 Text contains numerous awkward phrasing or typos or redundancies. The senior co-  
259 authors should spend some time looking through the text and make the necessary  
260 improvements; this is not the reviewer’s job. Nevertheless, some are listed hereafter (not  
261 an exhaustive list):

262

263 Reply:

264 We apologize for this oversight. We will do our utmost to significantly improve the language  
265 quality of the text.

266

267 L40 + L 337: Labile instead of “liable”?

268

269 Reply:

270 Will be replaced.

271

272 L 55: context instead of « contest” ?

273

274 Reply:

275 Will be replaced.

276

277 L42: “phytoplankton behaviors » is awkward, please rephrase.

278

279 Reply:

280 Will be rephrased.

281

282 L61: most instead of “highest”

283

284 Reply:

285 Will be replaced.

286

287 L66: “FCO2 efflux » is redundant sinc "F" of "FCO2" abbreviates the word flux.

288

289 Reply:

290 Will be replaced.

291

292 L68: "high-resolution" is self-evaluation, please simply state instead the actual time step of  
293 the data.

294

295 Reply:

296 Extra descriptions will be added.

297

298 L 368: “CO2 drawdown ratio by water quality management” is awkward, please rephrase.

299

300 Reply:

301 Will be rephrased.

302

303

304

305

306

307

308

309

310

311

312

313

314

315



316 **References**

- 317 Amann, T., Weiss, A., & Hartmann, J. (2012). Carbon dynamics in the freshwater part of the Elbe  
318 estuary, Germany: Implications of improving water quality. *Estuarine, Coastal and Shelf*  
319 *Science*, 107, 112-121. <https://doi.org/10.1016/j.ecss.2012.05.012>
- 320 Borges, A. V., Darchambeau, F., Lambert, T., Bouillon, S., Morana, C., Brouyere, S., Hakoun, V.,  
321 Jurado, A., Tseng, H. C., Descy, J. P., & Roland, F. A. E. (2018). Effects of agricultural land  
322 use on fluvial carbon dioxide, methane and nitrous oxide concentrations in a large  
323 European river, the Meuse (Belgium). *Sci Total Environ*, 610-611, 342-355.  
324 <https://doi.org/10.1016/j.scitotenv.2017.08.047>
- 325 Campos, J. L., Valenzuela-Heredia, D., Pedrouso, A., Val del Río, A., Belmonte, M., & Mosquera-  
326 Corral, A. (2016). Greenhouse gases emissions from wastewater treatment plants:  
327 minimization, treatment, and prevention. *Journal of Chemistry*, 2016.
- 328 Crawford, J. T., Loken, L. C., Stanley, E. H., Stets, E. G., Dornblaser, M. M., & Striegl, R. G. (2016).  
329 Basin scale controls on CO<sub>2</sub> and CH<sub>4</sub> emissions from the Upper Mississippi River.  
330 *Geophysical Research Letters*, 43(5), 1973-1979. <https://doi.org/10.1002/2015gl067599>
- 331 Demars, B. O. L., Gíslason, G. M., Ólafsson, J. S., Manson, J. R., Friberg, N., Hood, J. M., Thompson,  
332 J. J. D., & Freitag, T. E. (2016). Impact of warming on CO<sub>2</sub> emissions from streams  
333 countered by aquatic photosynthesis. *Nature Geoscience*, 9(10), 758-761.  
334 <https://doi.org/10.1038/ngeo2807>
- 335 Edenhofer, O. (2015). *Climate change 2014: mitigation of climate change*, . Cambridge University  
336 Press.
- 337 ICPER. (2023). International Commission for the Protection of the Elbe River · ICPER.  
338 (<https://www.ikse-mkol.org/> last access on 2023-12-04).
- 339 Kempe, S. (1982). Long-term records of CO<sub>2</sub> pressure fluctuations in fresh waters. *SCOPE/UNEP*  
340 *Sonderband*, 52, 91-332.
- 341 Lasaki, B. A., Maurer, P., Schönberger, H., & Alvarez, E. P. (2023). Empowering municipal  
342 wastewater treatment: Enhancing particulate organic carbon removal via chemical  
343 advanced primary treatment. *Environmental Technology & Innovation*, 32.  
344 <https://doi.org/10.1016/j.eti.2023.103436>
- 345 Lin, P., Pan, M., Beck, H. E., Yang, Y., Yamazaki, D., Frasson, R., David, C. H., Durand, M., Pavelsky,  
346 T. M., Allen, G. H., Gleason, C. J., & Wood, E. F. (2019). Global Reconstruction of  
347 Naturalized River Flows at 2.94 Million Reaches. *Water Resour Res*, 55(8), 6499-6516.  
348 <https://doi.org/10.1029/2019WR025287>
- 349 Mallast, U., Staniek, M., & Koschorreck, M. (2020). Spatial upscaling of CO<sub>2</sub> emissions from  
350 exposed river sediments of the Elbe River during an extreme drought. *Ecohydrology*,  
351 13(6). <https://doi.org/10.1002/eco.2216>
- 352 Marescaux, A., Thieu, V., Borges, A. V., & Garnier, J. (2018). Seasonal and spatial variability of the  
353 partial pressure of carbon dioxide in the human-impacted Seine River in France. *Sci Rep*,  
354 8(1), 13961. <https://doi.org/10.1038/s41598-018-32332-2>
- 355 Mwanake, R. M., Gettel, G. M., Wangari, E. G., Glaser, C., Houska, T., Breuer, L., Butterbach-Bahl,  
356 K., & Kiese, R. (2023). Anthropogenic activities significantly increase annual greenhouse  
357 gas (GHG) fluxes from temperate headwater streams in Germany. *Biogeosciences*,  
358 20(16), 3395-3422. <https://doi.org/10.5194/bg-20-3395-2023>

359 Nydahl, A. C., Wallin, M. B., & Weyhenmeyer, G. A. (2017). No long-term trends in pCO<sub>2</sub> despite  
360 increasing organic carbon concentrations in boreal lakes, streams, and rivers. *Global*  
361 *Biogeochemical Cycles*, *31*(6), 985–995. <https://doi.org/10.1002/2016gb005539>  
362 Qasem, N. A. A., Mohammed, R. H., & Lawal, D. U. (2021). Removal of heavy metal ions from  
363 wastewater: a comprehensive and critical review. *npj Clean Water*, *4*(1).  
364 <https://doi.org/10.1038/s41545-021-00127-0>  
365 Ran, L., Butman, D. E., Battin, T. J., Yang, X., Tian, M., Duvert, C., Hartmann, J., Geeraert, N., & Liu,  
366 S. (2021). Substantial decrease in CO<sub>2</sub> emissions from Chinese inland waters due to  
367 global change. *Nat Commun*, *12*(1), 1730. <https://doi.org/10.1038/s41467-021-21926-6>  
368 Ran, L., Lu, X. X., Richey, J. E., Sun, H., Han, J., Yu, R., Liao, S., & Yi, Q. (2015). Long-term spatial  
369 and temporal variation of CO<sub>2</sub> partial pressure in the Yellow  
370 River, China. *Biogeosciences*, *12*(4), 921–932. <https://doi.org/10.5194/bg-12-921-2015>  
371 Raymond, P. A., Zappa, C. J., Butman, D., Bott, T. L., Potter, J., Mulholland, P., Laursen, A. E.,  
372 McDowell, W. H., & Newbold, D. (2012). Scaling the gas transfer velocity and hydraulic  
373 geometry in streams and small rivers. *Limnology and Oceanography: Fluids and*  
374 *Environments*, *2*(1), 41–53. <https://doi.org/10.1215/21573689-1597669>  
375 Yang, Y., Pan, M., Beck, H. E., Fisher, C. K., Beighley, R. E., Kao, S. C., Hong, Y., & Wood, E. F.  
376 (2019). In Quest of Calibration Density and Consistency in Hydrologic Modeling:  
377 Distributed Parameter Calibration against Streamflow Characteristics. *Water Resources*  
378 *Research*, *55*(9), 7784–7803. <https://doi.org/10.1029/2018wr024178>

379
