# Supplementary material for: Long-term reduction in CO 2 emissions from the Elbe River due to water quality improvement
Source: Copernicus journal article supplement (doi:10.5194/bg-2023-131), 2023-08-15
Supplement: Supplementary file [file bg-2023-131-AC2-supplement.pdf]

1 Reviewer comments

2 [Author responses](#)

3

4 **RC2**

5

6 This manuscript presents long-term water quality time series data from the Elbe River in  
7 Europe. The authors use alkalinity and pH measurements to estimate dissolved CO<sub>2</sub>  
8 concentrations, which they use to estimate CO<sub>2</sub> emissions from the river and tributaries  
9 from 1984 to 2018. They then compare the temporal changes in CO<sub>2</sub> emissions with the  
10 temporal changes in DIC, DOC and POC loads at the watershed's outlet, along with other  
11 water quality parameters. The authors show a decrease in CO<sub>2</sub> emissions, which they  
12 relate to an improvement in water quality, particularly a decrease in DOC.

13 The paper suffers from several shortcomings in methodology, a poor presentation of  
14 results, and considerable issues with the English language. I must admit this comes as a  
15 surprise considering the list of authors, some of whom are widely recognized and  
16 respected in the scientific community. I think there is potential to improve this paper  
17 substantially, because the dataset holds significant value—but much more guidance will  
18 need to be provided by the co-authors. In the following I will elaborate on the three main  
19 concerns I have.

20

21 [Reply:](#)

22 [Thank you for your thorough review. We apologize for shortcomings in the scientific  
23 quality. We will do our best to revise the text, keeping in mind also language issues.](#)

24

25 [In the methodology section, we will include an analysis of the uncertainties associated  
26 with pCO<sub>2</sub> and provided more details about the load calculations.](#)

27

28 [In the results section, we will incorporate a time series analysis of pCO<sub>2</sub> and biomass.](#)

29 [The results of the Mann-Kendall test will also be included.](#)

30

31 **Methodological limitations**

32 One limitation is that the entire paper is based on the use of two indirect methods to  
33 estimate CO<sub>2</sub> emissions. First, pCO<sub>2</sub> estimates are indirectly calculated from pH and  
34 alkalinity measurements. While this is a common undertaking, the authors must at least  
35 provide a quantification of uncertainties. Their plot comparing pCO<sub>2</sub> estimates based on  
36 two different packages (PHREEQC and CO<sub>2</sub>SYN) raises concerns as it shows large  
37 differences between the two sets of estimates. Second, the CO<sub>2</sub> emission estimates lack  
38 actual measurements. The authors use an empirical model which was primarily  
39 developed for smaller streams and might not be suitable to large rivers. The model  
40 results are not evaluated against actual measurements. Again, this needs to be justified  
41 (i.e. why was this particular model chosen and not another one?), and an assessment of  
42 uncertainties should be presented.

43

44

45 Reply:

46 Thank you very much for your suggestions.

47

48 We selected CO2SYS (Lewis & Wallace, 1998) over Phreeqc (Parkhurst & Appelo, 2013)  
49 for the calculations as not all datapoints provided the anions and cations required for a  
50 reliable calculation in Phreeqc. About 60% of the sample points have major ion data. The  
51 comparison of both calculations shows that there is an offset between measurements,  
52 resulting in about 16% higher pCO<sub>2</sub> values (Figure S4), when calculated with CO2SYS.  
53 To keep results consistent and comparable, in the study we calculated all data with  
54 CO2SYS, accepting the potential error.

55

56 To evaluate the uncertainty in pCO<sub>2</sub> estimates, we will focus on the calculation methods,  
57 as direct pCO<sub>2</sub> or F<sub>CO2</sub> measurements are unavailable. CO2SYS (Humphreys et al.,  
58 2022) provides an approach to calculate the error propagation. The errors included in the  
59 propagation are:

60 1) pH: General precision of standard commercial pH probes is typically between ±0.01 to  
61 ±0.1, so we will assume ±0.05.

62 2) TA: General precision of TA measurement by titration methods ranging from ±10 to  
63 ±50 μmol L<sup>-1</sup>, so we will assume ±20 μmol L<sup>-1</sup>.

64 3) Temperature: assumed as ±0.1 °C.

65

66 Finally, this approach leads to an estimated uncertainty of around ±12% by CO2SYS.  
67 Additionally, we will re-estimate the propagation errors in CO<sub>2</sub> efflux calculations using  
68 the Monte Carlo method.

69

70 For the width estimation model by flow discharge from Raymond et al. (2012), which is  
71 designed to the estimate of smaller rivers. For analysis the potential errors caused by this  
72 equation. We compare our results from different Strahler orders:

73

74 Most of the Elbe River's flow, categorized with Strahler orders from 1 to 6, matches the  
75 flow discharge range used to create the equation by Raymond et al. (2012) (Figure R1).

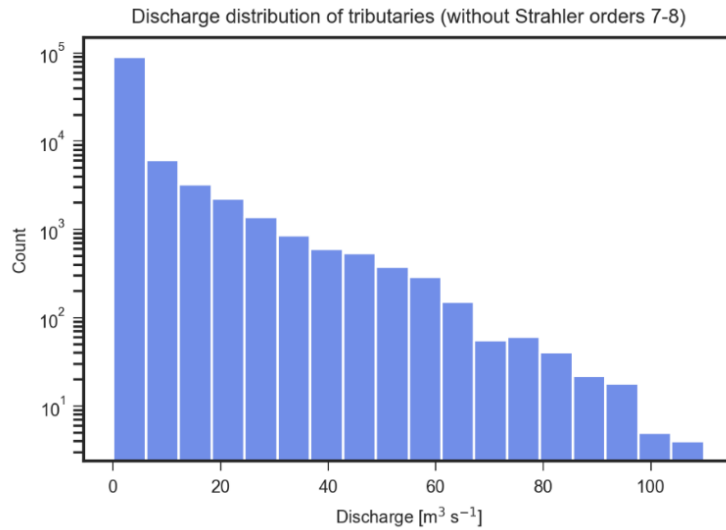

76

77 Figure R1. Flow discharge distribution of tributaries of the Elbe River. Flow discharge data obtained and  
 78 resampled from GRADES (The Global Reach-scale A priori Discharge Estimates for SWOT) (Lin et al.,  
 79 2019; Yang et al., 2019).

80

81 For the larger segments of the river, classified as Strahler orders 7 and 8, primarily the  
 82 mainstem, we compared our estimated river widths with the research of Mallast et al.  
 83 (2020). Their measurements were derived from satellite imagery. The average river width  
 84 we estimated showed good agreement with their findings (this research: 177 m for  
 85 Strahler order 7&8 (Figure R2), versus Mallast et al. (2020): 183 m, with an area of 107  
 86 km<sup>2</sup> divided by a length of 594 km).

87

88 Therefore, we believe the error introduced by our method in this research should be  
 89 minor. An additional discussion of uncertainties will be added.

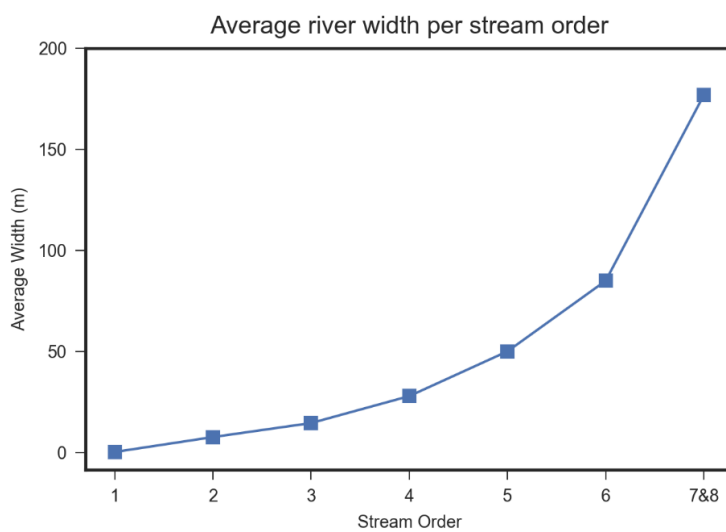

90

91 Figure R2: Estimated River width across different Strahler orders.

92 Another critical issue is with the use of discharge values for k600 estimates. From what I  
93 gather, the authors have used only one discharge value for each river location. This  
94 approach is problematic because k600 is highly influenced by discharge fluctuations, and  
95 failing to account for discharge fluctuations will result in erroneous CO<sub>2</sub> emission flux  
96 estimates. This issue becomes evident in Figure 3f, where the relationship between  
97 FCO<sub>2</sub> and pCO<sub>2</sub> is almost perfectly linear—either suggesting that k600 has no influence  
98 on FCO<sub>2</sub>, or that k600 remains constant across space and time, both of which are  
99 improbable.

100 Reply:

101 In our study, the flow data used for calculations were extracted from the GRADES  
102 database (Lin et al., 2019; Yang et al., 2019), specifically selected to correspond with the  
103 dates of hydro-chemical data sampling. This database offers daily records of flow  
104 discharge, inherently accounting for the influence of flow variations on the seasonal k<sub>600</sub>  
105 values. We will also provide the correlation analysis between variations in k<sub>600</sub> and F<sub>CO<sub>2</sub></sub>.

106

107 Additionally, a comparative analysis between data from the GRADES database and  
108 actual measurements provided by hydrological stations will be conducted. A short  
109 discussion in long-term changes in discharge and the impact on F<sub>CO<sub>2</sub></sub> will be included.

110

111 A third issue is with the DOC data. It appears that two methods are used for the DOC flux  
112 estimation, yet only one is presented in the Results section. Furthermore, the first method  
113 does not present a way to calculate loads, but simply provides a framework for  
114 classifying C-Q patterns, which is rather confusing.

115

116 Reply:

117 Two calculation methods are described in the text, both founded on the principle of fitting  
118 the concentration to a model that utilizes the flow discharge to adjust the concentration.  
119 These approaches result in final errors that stem from the differences between the  
120 measured values and the values derived from model fitting.

121

122 Detailed explanations of this calculation process and uncertainties analysis will be  
123 provided in the methods section and in the supplementary.

124

125 Furthermore, upon comparison, the results from two methods show little differences.  
126 Therefore, we have applied the average of the two as the result.

127

## 128 **Presentation of results**

129 The results of statistical tests are not consistently reported throughout the paper. For  
130 example, Mann-Kendall trend test results are not presented for pCO<sub>2</sub> and FCO<sub>2</sub> (L231-  
131 261) as well as for DIC, DOC and POC (L276-291), making it challenging to assess the  
132 significance of the observed trends. Furthermore, there are no reported step change test  
133 results, despite the mention of these tests in the Methods section.

134

135 Reply:  
136 The results of the Mann-Kendall test and the step change test for parameters such as  
137 pCO<sub>2</sub>, F<sub>CO<sub>2</sub></sub>, DIC, DOC, and POC, etc., will be added.

138  
139 I also noted some inconsistent statements between the results and discussion: while on  
140 L281 the authors state that “POC, DOC and DIC loads did not show significant trends”,  
141 this contradicts the following statement that the DOC load “showed relatively robust  
142 decreasing trend” (L310-311).

143  
144 Reply:  
145 According to the Mann-Kendall test, DOC load exhibit significant decreasing trends  
146 (p<0.01).

147  
148 We will address this correction and thoroughly review the entire manuscript to avoid such  
149 mistakes.

150  
151 Lastly, several figures are missing. For instance, the pCO<sub>2</sub> time-series data are not  
152 shown despite these data being arguably one of the most critical data of the paper.

153  
154 Reply:  
155 A set of more comprehensive analyses, including additional time-series plots with pCO<sub>2</sub>  
156 and other parameters, will be added to the manuscript.

157  
158 **English language**  
159 The paper is very challenging to understand, and clearly the more senior authors (some  
160 of whom are well-published) have not provided the necessary feedback. It seems like  
161 only the abstract and the first few paragraphs of the introduction have been edited. The  
162 language used is awkward at best, and completely incoherent at worst. As a reviewer, I  
163 am not willing to invest one or two days correcting grammar and editing the entire paper.  
164 I strongly recommend that the senior authors fulfil their responsibilities of reviewing and  
165 editing this paper.

166  
167 Reply:  
168 We will fully revise the manuscript from all the co-authors.

169  
170  
171  
172  
173  
174  
175  
176  
177

178 **References**

- 179 Humphreys, M. P., Lewis, E. R., Sharp, J. D., & Pierrot, D. (2022). PyCO2SYS v1.8: marine  
180 carbonate system calculations in Python. *Geosci. Model Dev.*, *15*(1), 15-43.  
181 <https://doi.org/10.5194/gmd-15-15-2022>
- 182 Lewis, E., & Wallace, D. (1998). *Program developed for CO2 system calculations*.
- 183 Lin, P., Pan, M., Beck, H. E., Yang, Y., Yamazaki, D., Frasson, R., David, C. H., Durand, M., Pavelsky,  
184 T. M., Allen, G. H., Gleason, C. J., & Wood, E. F. (2019). Global Reconstruction of  
185 Naturalized River Flows at 2.94 Million Reaches. *Water Resour Res*, *55*(8), 6499-6516.  
186 <https://doi.org/10.1029/2019WR025287>
- 187 Mallast, U., Staniek, M., & Koschorreck, M. (2020). Spatial upscaling of CO2 emissions from  
188 exposed river sediments of the Elbe River during an extreme drought. *Ecohydrology*,  
189 *13*(6). <https://doi.org/10.1002/eco.2216>
- 190 Parkhurst, D. L., & Appelo, C. (2013). Description of input and examples for PHREEQC version  
191 3—a computer program for speciation, batch-reaction, one-dimensional transport, and  
192 inverse geochemical calculations. *US geological survey techniques and methods*, *6*(A43),  
193 497.
- 194 Raymond, P. A., Zappa, C. J., Butman, D., Bott, T. L., Potter, J., Mulholland, P., Laursen, A. E.,  
195 McDowell, W. H., & Newbold, D. (2012). Scaling the gas transfer velocity and hydraulic  
196 geometry in streams and small rivers. *Limnology and Oceanography: Fluids and*  
197 *Environments*, *2*(1), 41-53. <https://doi.org/10.1215/21573689-1597669>
- 198 Yang, Y., Pan, M., Beck, H. E., Fisher, C. K., Beighley, R. E., Kao, S. C., Hong, Y., & Wood, E. F.  
199 (2019). In Quest of Calibration Density and Consistency in Hydrologic Modeling:  
200 Distributed Parameter Calibration against Streamflow Characteristics. *Water Resources*  
201 *Research*, *55*(9), 7784-7803. <https://doi.org/10.1029/2018wr024178>

202
