# Supplementary material for: Long-term reduction in CO 2 emissions from the Elbe River due to water quality improvement
Source: Copernicus journal article supplement (doi:10.5194/bg-2023-131), 2023-08-15
Supplement: Supplementary file [file bg-2023-131-AC3-supplement.pdf]

1 Reviewer comments

2 [Author responses](#)

3

4 **CC1**

5

6 It is a very good idea to use long term monitoring data to investigate the effect of the  
7 socioeconomic changes in Germany after re-unification on GHG emissions from a large  
8 river. The paper contains a very nice dataset including both main river and tributary data  
9 which allows the investigation of both spatial and inter-annual pattern. However, in my eyes  
10 the manuscript does not fully exploit the potential of the dataset and has some serious  
11 issues which I would like to address in the following:

12

13 [Reply:](#)

14 [Thank you for your thorough review and valuable additional input.](#)

15

16 I cannot follow the argumentation that nutrient driven eutrophication should increase CO<sub>2</sub>.  
17 Any CO<sub>2</sub> produced from decaying algae was fixed by those algae before. Thus, the cycle  
18 of primary production and algae mineralization cannot increase CO<sub>2</sub> emissions. In contrast  
19 it has the potential to reduce CO<sub>2</sub> emissions if algae are buried in the sediments – a  
20 scenario relevant for lakes but probably not for rivers.

21

22 [Reply:](#)

23 [Thank you. It's true that eutrophication typically results in a decrease of CO<sub>2</sub> due to the](#)  
24 [uptake by photosynthetic phytoplankton. However, recent research suggests this impact](#)  
25 [could be reversed. For instance, Kim et al. \(2021\) found a V-shaped relationship between](#)  
26 [TN/TP and pCO<sub>2</sub>, together with upshift relation between Chl-a and CO<sub>2</sub>, indicating that](#)  
27 [beyond a certain threshold, eutrophication enhanced biomass could act as a source of CO<sub>2</sub>](#)  
28 [in the Han River, Korea. This is why we initially highlighted this potential. Ultimately, our](#)  
29 [results for the Elbe demonstrated a negative relationship between biomass and pCO<sub>2</sub>](#)  
30 [\(Figures 3c and 3d\), indicating effects of uptake rather than impact as a source in the Elbe](#)  
31 [River.](#)

32

33 [Will be rephrased.](#)

34

35 I would hypothesize that correlation between N or P with CO<sub>2</sub> might be a pseudo correlation  
36 and not a direct mechanistic link. As written in the manuscript, wastewater contains both  
37 DOC and inorganic nutrients.

38

39 [Reply:](#)

40 [In fact, in our view we believe that if the decrease in CO<sub>2</sub> were solely correlated with the](#)  
41 [amount of organic carbon, then a direct correlation between pCO<sub>2</sub> and DOC or TOC would](#)  
42 [be expected, which was not identified. The negative correlation between RUE and the](#)  
43 [pCO<sub>2</sub> suggests that biomass carbon uptake efficiency has the potential to contribute to the](#)  
44 [decrease in pCO<sub>2</sub>.](#)

45 In addition, before the unification, less wastewater treatment in Eastern Germany led to  
46 higher more labile carbon input to the river water.

47

48 In the manuscript a rather crude method is used to estimate river surface area. The  
49 resulting surface area of 735 km<sup>2</sup> (supplement) looks rather high. Divided by river length  
50 this means a river width of about 1 km – an unrealistic high value. In Mallast et al. (2020)  
51 we determined a surface area of 106 km<sup>2</sup> from satellite images.

52

53 Reply:

54 Thank you for providing this valuable reference information.

55

56 Mallast et al. (2020) utilized high-resolution satellite imagery to estimate the water area  
57 with great accuracy, which only included mainstem portion, refer to the 7-8 Strahler order  
58 river network considered for our estimation.

59

60 We also extracted this segment of the river network for comparison. Based on our  
61 estimation results for 2018, the river width results are quite similar, (this research: 177 m  
62 for Strahler order 7&8, versus Mallast et al. (2020): 183 m, with an area of 107 km<sup>2</sup> divided  
63 by a length of 594 km) (Figure R1).

64

65 Therefore, we believe that the error in our estimation is not significant, and the results are  
66 reliable. And we will add the comparison results for the uncertainties discussion.

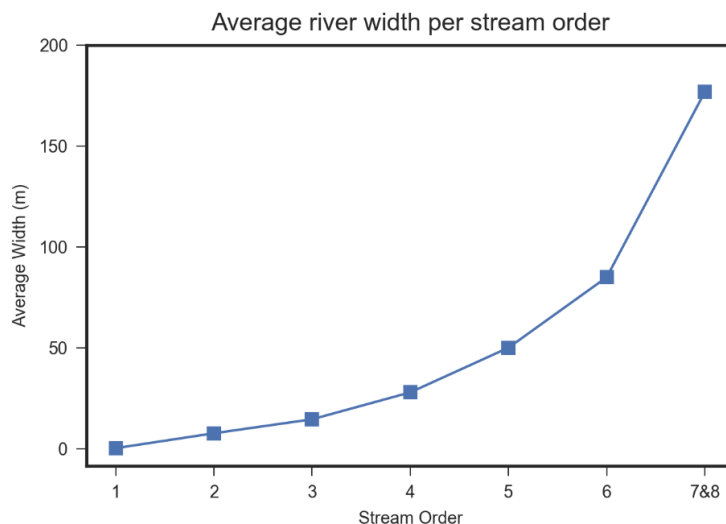

67

68 Figure R1: Estimated River width across different Strahler orders.

69

70 The gas transfer velocity was estimated from slope and flow velocity. However, there are  
71 also k600 data from River Elbe published (Matoušů et al., 2019). It should at least be  
72 checked how estimated k600 data compare to measured ones.

73

74 Reply:

75 We will compare the results with our calculations.

76 In Kamjunke et al. (2022) and Kamjunke et al. (2023) it was shown that there is a  
77 longitudinal gradient with plankton concentrations increasing downstream the river. It  
78 would be interesting to analyze the dataset in this paper with respect to this gradient.  
79 Was the transition zone between plankton poor and plankton rich water moving  
80 downstream after 1990?

81

82 Reply:

83 We are also interested in examining the longitudinal gradient in relation to plankton  
84 concentrations to identify the transition zone between areas of plankton-poor and  
85 plankton-rich waters downstream after 1990.

86

87 We will add data concerning the longitudinal gradient to the plankton concentrations from  
88 a series of monitoring stations in case they show meaningful results.

89

90 The dataset also should allow the comparison of different tributaries. Statistical relations  
91 between CO<sub>2</sub> and other parameters could be checked for each tributary separately. This  
92 can be used to investigate the drivers of CO<sub>2</sub> in the different sub-catchments. The effect  
93 of the tributaries on the main stream, however, is probably difficult to detect. In  
94 Bussmann et al. (2022) for example we showed that the high dilution effect at the  
95 confluence did not allow the detection of CH<sub>4</sub> import from the tributaries into the main  
96 river.

97

98 Reply:

99 Thank you for your valuable suggestion to utilize the dataset for comparing various  
100 tributaries and examining the statistical relationships between CO<sub>2</sub> and other parameters  
101 for each tributary individually. We will attempt to conduct separate statistical analyses for  
102 each tributary where water chemistry data are available.

103

104 Recent literature shows that CO<sub>2</sub> concentrations in rivers fluctuate diurnally (Gómez-  
105 Gener et al., 2021). Thus, scaling up CO<sub>2</sub> emissions from single datapoints means  
106 accepting a systematic uncertainty. Our own measurements show that diurnal fluctuation  
107 of CO<sub>2</sub> is an issue in River Elbe (manuscript in preparation). This could be relevant in  
108 long term time series, if the time of day when samples were taken changed during the  
109 time series.

110

111 Reply:

112 Thank you. The long-term effect is also important since respiration obviously dominates  
113 photosynthesis during the night (Gómez-Gener et al., 2021). However, according to the  
114 datasets of FGG, the time distribution listed below (Figure R2), most of the sampling  
115 happened during daytime, therefore, it is not available to analysis the impact in this  
116 event.

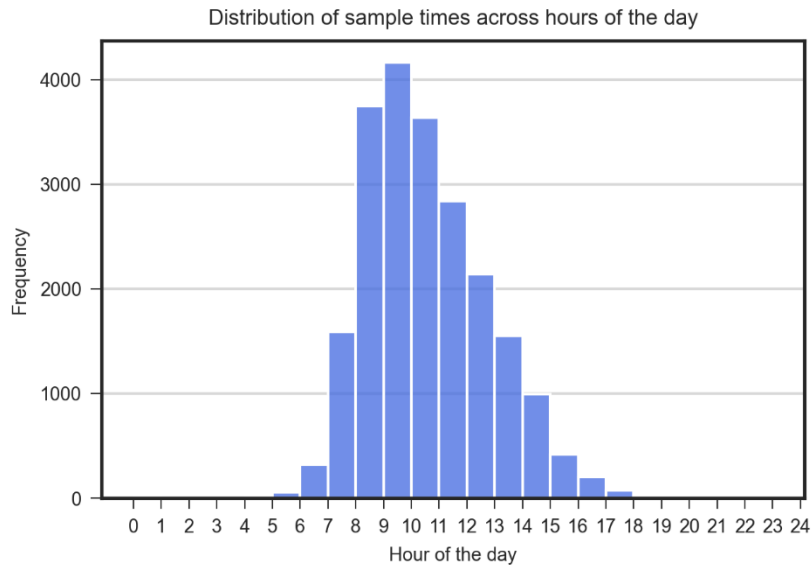

117

118 [Figure R2. Distribution of manual sampling times in the Elbe River](#)

119 If CO<sub>2</sub> emissions are primarily driven by DOC mineralization the dataset should allow a  
 120 quantitative comparison between the two. Was DOC decreasing downstream and how  
 121 does that downstream decrease of DOC compare quantitatively to CO<sub>2</sub> emissions? Such  
 122 a question could be investigated by looking at monitoring data from longer reaches  
 123 without major tributaries.

124

125 [Reply:](#)

126 [Indeed, decreasing trends for both DOC fluxes and CO<sub>2</sub> emissions have been observed](#)  
 127 [in our research. Conducting a quantitative analysis to determine whether the decrease in](#)  
 128 [DOC is the primary driver of the reduction in CO<sub>2</sub> emissions in the Elbe River is an](#)  
 129 [excellent suggestion.](#)

130

131 [We will add a section on quantitative analysis to address this.](#)

132

133 An analysis of long-term changes of water quality in river Elbe was recently published by  
 134 (Wachholz et al., 2022)

135

136 [Reply:](#)

137 [The recent publication highlights the decrease in nutrient concentrations and](#)  
 138 [underscores the importance of water quality management, providing new resources for](#)  
 139 [our research.](#)

140

141 [We will add it as a reference.](#)

142

143

144

145

146 **References**

147 Gómez-Gener, L., Rocher-Ros, G., Battin, T., Cohen, M. J., Dalmagro, H. J., Dinsmore, K. J., Drake,  
148 T. W., Duvert, C., Enrich-Prast, A., Horgby, Å., Johnson, M. S., Kirk, L., Machado-Silva, F.,  
149 Marzolf, N. S., McDowell, M. J., McDowell, W. H., Miettinen, H., Ojala, A. K., Peter, H., . . .  
150 Sponseller, R. A. (2021). Global carbon dioxide efflux from rivers enhanced by high  
151 nocturnal emissions. *Nature Geoscience*, *14*(5), 289-294.

152 <https://doi.org/10.1038/s41561-021-00722-3>

153 Kim, D., Lim, J. H., Chun, Y., Nayna, O. K., Begum, M. S., & Park, J. H. (2021). Phytoplankton  
154 nutrient use and CO<sub>2</sub> dynamics responding to long-term changes in riverine N and P  
155 availability. *Water Res*, *203*, 117510. <https://doi.org/10.1016/j.watres.2021.117510>

156 Mallast, U., Staniek, M., & Koschorreck, M. (2020). Spatial upscaling of CO<sub>2</sub> emissions from  
157 exposed river sediments of the Elbe River during an extreme drought. *Ecohydrology*,  
158 *13*(6). <https://doi.org/10.1002/eco.2216>

159
